# Knockdown of DGKZ induces apoptosis and G2/M phase arrest in human acute myeloid leukemia HL-60 cells

Changhu Dong<sup>1\*</sup>, Hong Li<sup>1\*</sup>, Yanning Tian<sup>1</sup>, Xiang Li<sup>1</sup>, Bing Wang<sup>3</sup>, Dongzhi Zhai<sup>1</sup>, Yingying Bai<sup>1</sup>,  
Xu Chao<sup>1, 2#</sup>

<sup>1</sup> The Second Affiliated Hospital of Shaanxi University of Chinese Medicine, Xianyang,  
Shaanxi 712000;

<sup>2</sup> The College of Basical Medicine Sciences, Shaanxi University of Chinese Medicine,  
Xianyang, Shaanxi 712046;

<sup>3</sup> The College of Pharmacy, Shaanxi University of Chinese Medicine, Xianyang, Shaanxi  
712046

## Disclaimer Statement:

The authors have withdrawn this manuscript as they determined that it requires additional data to support their research conclusions. Furthermore, the author sequence is incorrect on this version of the manuscript. The authors therefore request that this preprint is not cited.
